# Supplementary material for: Porous WO3 with enhanced photocatalytic and selective gas sensing properties
Source: Royal Society of Chemistry journal article supplement (doi:10.1039/c1ce05579h), 2011-01-01
Supplement: c1ce05579h.pdf [file c1ce05579h.pdf]

## Electronic Supplementary Materials

# Porous WO<sub>3</sub> with Enhanced Photocatalytic and Selectively Gas Sensing Properties

Zhong Xie, Yuguang Zhu, Jing Xu, Hongtao Huang, Di Chen\* and Guozhen Shen\*

Wuhan National Laboratory for Optoelectronics (WNLO) and College of Optoelectronic Science  
and Engineering, Huazhong University of Science and Technology (HUST), Wuhan 430074,

China. Fax: 86-27-87792225. E-mail: [dichen@mail.hust.edu.cn](mailto:dichen@mail.hust.edu.cn). [gzshen@mail.hust.edu.cn](mailto:gzshen@mail.hust.edu.cn).

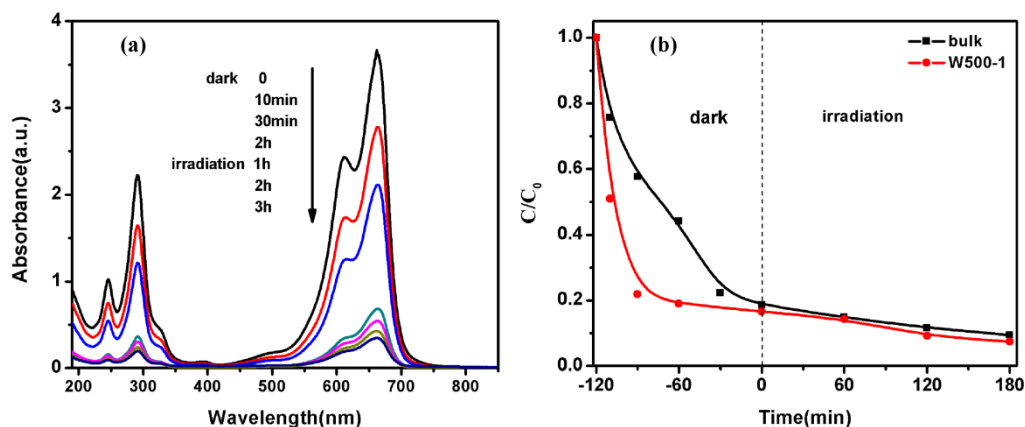

**Fig. S1** (a) UV-vis absorption spectra of the MB solution (16mg/L, 100ml) in the presence of 0.66g WO<sub>3</sub> bulk under visible light irradiation. (b) The concentration curves of W500-1 (calcined at 500 °C for 1h) and WO<sub>3</sub> bulk for the adsorption in dark and the degradation under visible light irradiation. The amounts of W500-1 sample and the bulk material were 0.1g and 0.66g, respectively.
